# Supplementary material
Source: publisher figshare collection journal article supplement (https://acs.figshare.com/ndownloader/files/8649016)
Supplement: Supplementary file 1 [file 8649016]

# Evolution of rGO-SnS<sub>2</sub> Hybrid Nanoparticle Electrodes in Li-ion Batteries

*Mohammad H. Modarres<sup>†</sup>, Jonathan Hua-Wei Lim<sup>◇</sup>, Chandramohan George,<sup>\*†</sup>*

*and Michael De Volder<sup>\*†</sup>*

<sup>†</sup>Institute for Manufacturing, Department of Engineering, 17 Charles Babbage Road,  
Cambridge, CB3 0FS, United Kingdom.

<sup>◇</sup>Cavendish Laboratory, Department of Physics, University of Cambridge, J.J. Thomson  
Avenue, Cambridge CB3 0HE, United Kingdom

gc495@cam.ac.uk; mfl2@cam.ac.uk

## **Supporting Information**

## Materials

Graphite was obtained from Asbury Carbons and was used without any pre-treatment. Electrochemical grade propylene carbonate, ethylene carbonate, diethyl carbonate, N-methyl-2-pyrrolidone, polyvinylidene fluoride, and Li metal foils were purchased from Sigma-Aldrich. Carbon powder (carbon super P) were purchased from Alfa Aesar. Polypropylene layers were purchased from Cell Guard.

## GITT measurement and Li-ion diffusion (D) calculation:

GITT measurements with high diffusion sensitivity were performed on the rGO-SnS<sub>2</sub> cells applying current pulses (~100 mA/g) for 1 minute, followed by a relaxation time for 2 min. The apparent diffusion coefficient  $\tilde{D}_{\text{Li}}$  was calculated by adopting the formula reported by Wen et al<sup>1</sup>. The change of the electrode potential was due to stoichiometric change  $\frac{dE}{dx}$ . The slopes of the  $E$  vs.  $\sqrt{t}$ ,  $\frac{dE}{d\sqrt{t}}$  were derived for every pulse. From these, the diffusion coefficient was calculated at potentials,  $E$  (at the end of the relaxation time).

$$\tilde{D}_{\text{Li}} = \frac{4}{\pi} \left( \frac{iV_m}{z_A F S} \right)^2 \left( \frac{\frac{dE}{dx}}{\frac{dE}{d\sqrt{t}}} \right)^2$$

where,  $z_A$  is the charge number (=1 for lithium);  $S$  is the effective surface area;  $V_m$  is the molar volume.

### Thermogravimetric (TGA) analysis of rGO-SnS<sub>2</sub> hybrid

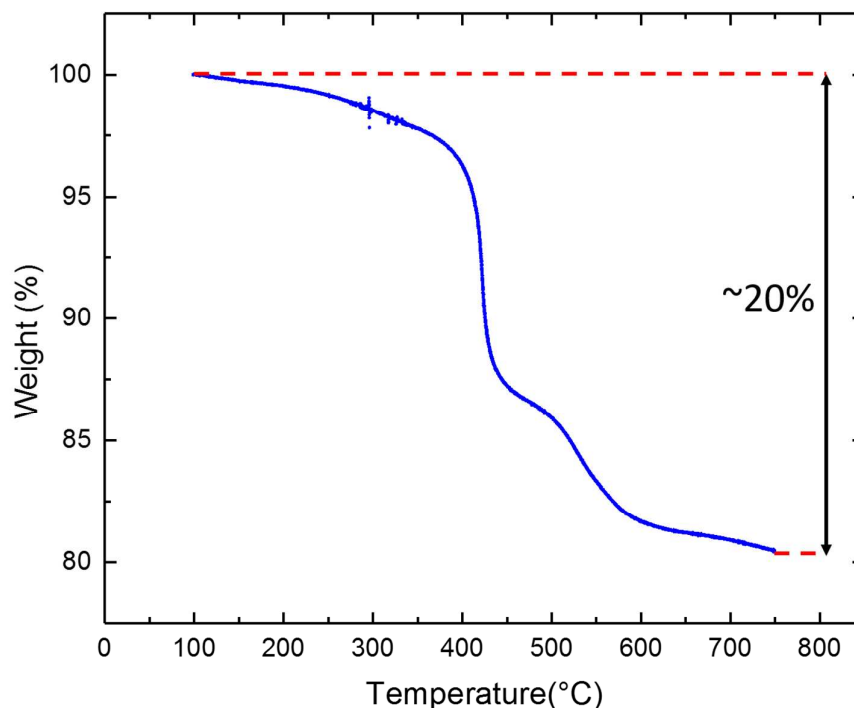

**Figure S1** TGA analysis of rGO-SnS<sub>2</sub> hybrid material performed in air at a heating rate of 5 °C/min. The initial weight loss (up to ~200 °C) is due to removal of physisorbed and chemisorbed water. Subsequent weight loss is due to oxidation of SnS<sub>2</sub> to SnO<sub>2</sub> and the removal of rGO. The overall weight loss was found to be ~20%. The proportion of rGO in the hybrid is estimated to be ~5 wt%.

### Post-mortem SEM characterisation of rGO-SnS<sub>2</sub> battery electrode

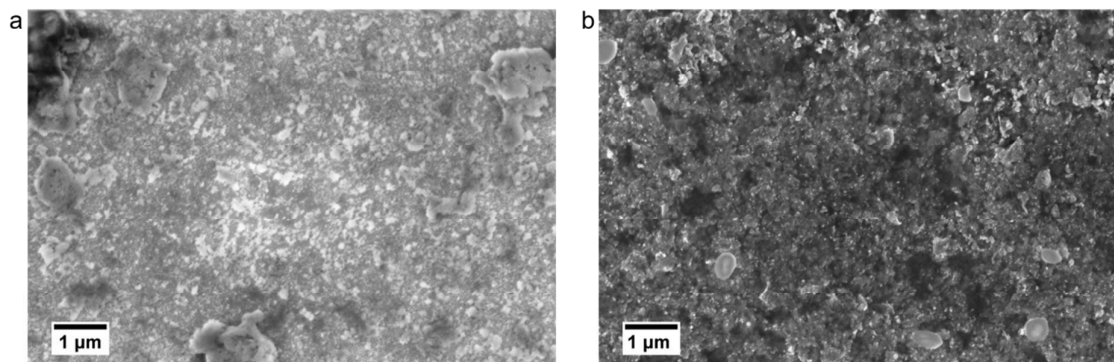

**Figure S2** SEM images of cycled electrodes a) 50 cycles at 1000 mA g<sup>-1</sup> ; b) 100 cycles at 100 mA g<sup>-1</sup>. Agglomerates were observed on these cycled electrodes in de-lithiated state, indicating a rapid growth of amorphous phases originating from the electrode reactions, with larger agglomerates forming on electrodes that were cycled at a faster rate.

### XRD and Raman data of rGO-SnS<sub>2</sub> from the initial cycles.

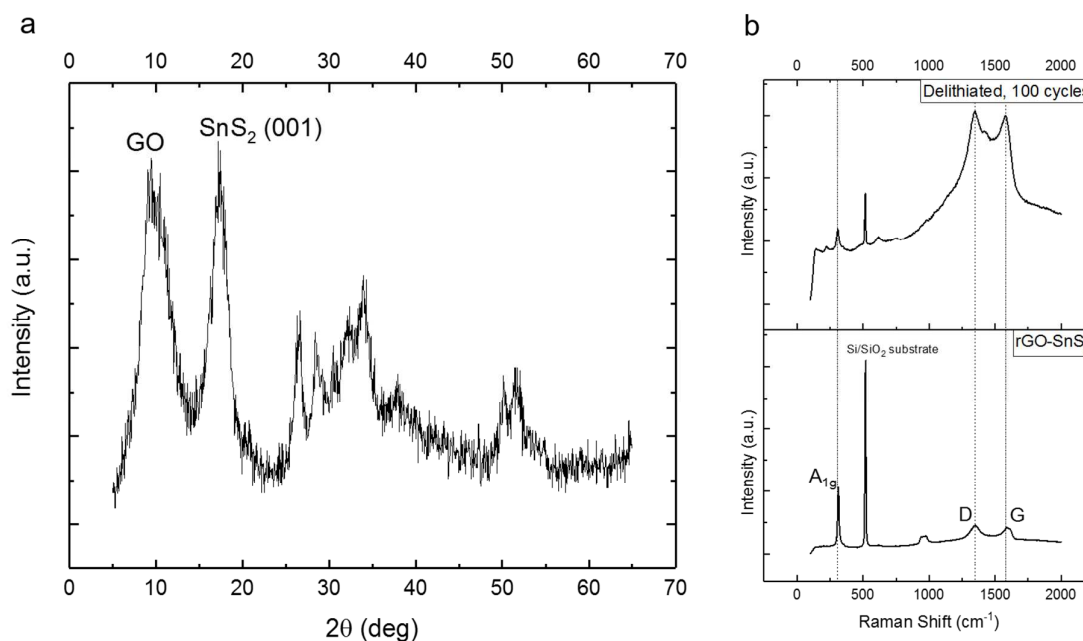

**Figure S3** rGO-SnS<sub>2</sub> electrodes after 100 cycles at 100 mAh/g. a) XRD data from the battery electrode shows a peak associated with GO and a broadened and shifted SnS<sub>2</sub> peak b) Raman spectra shows the presence of the SnS<sub>2</sub> A<sub>1g</sub> peak as well as the D and G peaks of graphene oxide.

### The performance of the pure SnS<sub>2</sub> electrodes reported in the literature.

| No | Electrode                                                   | 1 <sup>st</sup> cycle               | 2 <sup>nd</sup> cycle              | Cycling capacity                                          | Current max                              | Reference                                                                       |
|----|-------------------------------------------------------------|-------------------------------------|------------------------------------|-----------------------------------------------------------|------------------------------------------|---------------------------------------------------------------------------------|
| 1  | SnS <sub>2</sub> nanosheets in 100-200 nm agglomerates      | ~1600 mAh/g at 100 mA/g             | ~600 mAh/g at 100 mA/g             | >~ 10 mAh/g after 40 cycle at 100mA/g                     | N/A                                      | Chuanxin Zhai et al; <i>ACS Appl. Mater. Interfaces</i> 2011, 3, 4067-4074      |
| 2  | SnS <sub>2</sub> nanoparticle ~80nm                         | ~1580 mAh/g at 50 mA/g              | ~620 mAh/g at 50 mA/g              | ~ 293 mAh/g after 50 cycles at 50 mA/g                    | ~100 mAh/g at 1C                         | Hyun Sik Kim et al; <i>Electrochimica Acta</i> 54 2009, 3606-3610               |
| 3  | SnS <sub>2</sub> nanoparticles ≥ ~0.5 μm                    | 1104.5 mAh/g                        | ~400 mAh/g at 100 mA/g             | ~290 mAh/g after 50 cycles at 100 mA/g                    | ~100 mAh/g at 800 mA/g                   | Dongsheng Guan et al; <i>Journal of Alloys and Compounds</i> 658 (2016) 190-197 |
| 4  | SnS <sub>2</sub> powder                                     | ~1300 mAh/g at 200 mA/g             | ~600 mAh/g at 200 mA/g             | ~600 mAh/g at 200 mA/g after 5 cycles                     | ~200 mAh/g at 1000 mA/g                  | Zhi Xiang Huang et al; <i>2D Mater.</i> 2 (2015) 024010                         |
| 5  | SnS <sub>2</sub> flower-like (≥ ~0.5 μm)                    | 1540 mAh/g at 100mA/g               | 560 mAh/g at 100 mA/g              | ~417 mAh/ g after 50 cycles at 100 mA/g                   | N/A                                      | Manoj K. Jana et al; <i>CrystEngComm</i> , 2014, 16, 3994-4000                  |
| 6  | SnS <sub>2</sub> nanoplates of a lateral size of 100-150 nm | 1438 mA h/ g at 100 mA/g            | 579 mA h/ g at 100 mA/g            | 521 mA h/ g at 100 mA/g after 50 cycles                   | 136-340 mAh/g at 3000 mA/g               | Lingyan Wang et al; <i>Electrochimica Acta</i> 112 (2013) 439- 447              |
| 7  | SnS <sub>2</sub> NPS                                        | 1600 mAh/g at 50 mA/g               | ~550 mAh/g at 50mA/g               | ~310 mAh/g at 50 mA/g after 30 cycles                     | ~1.9 mAh/g at 1000 mA/g                  | Xin Jiang et al; <i>Journal of Power Sources</i> 237 (2013) 178-186             |
| 8  | SnS <sub>2</sub> (1 micron ) interconnected agglomerates    | 1602.9 mAh /g at 100 mA/g           | 850 mAh/g at 100 mA/g              | 282.2 mAh/ g at 100 mA/g after 50 cycles                  | ~0 mAh/g at 1000 mA/g                    | Jianping Li et al; <i>Electrochimica Acta</i> 111 (2013) 862- 868               |
| 9  | SnS <sub>2</sub> powder                                     | 600 mAh/g at 0.2 mA/cm <sup>2</sup> | 500mAh/g at 0.2 mA/cm <sup>2</sup> | ~120-160 mAh/g at 3.2 mA /cm <sup>2</sup> after 20 cycles | >~50-70 mAh/g at 25.6 mA/cm <sup>2</sup> | Shuangyu Liu et al; <i>ACS Appl. Mater. Interfaces</i> 2013, 5, 1588-15         |
| 10 | SnS <sub>2</sub> nanorods                                   | ~1050 mAh/g at 160 mA/g             | ~850 mAh/g at 160 mA/g             | ~400 mAh/g at 160 mA/g after 50 cycle                     | -                                        | Alok M. Tripathi et al; <i>RSC Adv.</i> , 2015, 5, 23671-23682                  |

**Table S1:** Some pure SnS<sub>2</sub> battery electrodes performance reported in literature.

Reference:

- (1) Wen, C. J.; Boukamp, B. A.; Huggins, R. A.; Weppner, W. Thermodynamic and Mass Transport Properties of “LiAl.” *J. Electrochem. Soc.* **1979**, *126*, 2258.
